# Supplementary material for: A versatile genetic engineering toolkit for E. coli based on CRISPR-prime editing
Source: PubMed Central journal article supplement (PMC8410854; doi:10.1038/s41467-021-25541-3), 2021-09-01
Supplement: 41467_2021_25541_MOESM1_ESM.pdf [file 41467_2021_25541_MOESM1_ESM.pdf]

Supplementary information for

## **A versatile genetic engineering toolkit for *E. coli* based on CRISPR-prime editing**

Yaojun Tong<sup>1,2,\*</sup>, Tue S. Jørgensen<sup>1</sup>, Christopher M. Whitford<sup>1</sup>, Tilmann Weber<sup>1,\*</sup>,  
Sang Yup Lee<sup>1,3,\*</sup>

<sup>1</sup>The Novo Nordisk Foundation Center for Biosustainability, Technical University of Denmark, 2800 Kgs. Lyngby, Denmark.

<sup>2</sup>State Key Laboratory of Microbial Metabolism, School of Life Sciences and Biotechnology, Shanghai Jiao Tong University (SJTU), Shanghai 200240, China.

<sup>3</sup>Department of Chemical and Biomolecular Engineering, BioProcess Engineering Research Center, Bioinformatics Research Center, Institute for the BioCentury, Korea Advanced Institute of Science and Technology (KAIST), Daejeon 34141, Republic of Korea.

\*To whom correspondence should be addressed [yaojun.tong@sjtu.edu.cn](mailto:yaojun.tong@sjtu.edu.cn) (Y.T.), [tiwe@biosustain.dtu.dk](mailto:tiwe@biosustain.dtu.dk) (T.W.), or [leesy@kaist.ac.kr](mailto:leesy@kaist.ac.kr) (S.Y.L.).

This file contains:

Supplementary note 1

Supplementary Tables 1-7

Supplementary Figures 1-6

## Supplementary note 1

### **A second nick does not increase the editing efficiency of CRISPR-Prime Editing system in *E. coli***

It has been reported that the editing efficiency of the reverse transcriptase-Cas9 H840A nickase (Cas9n)-mediated targeted prime editing in some mammalian cells<sup>1</sup> and plant cells<sup>2</sup> can be increased by introduction of a second nick to the complementary strand within around 100 bp from the site of the PEGRNA-induced nick. However, it also increases NHEJ-mediated indel formation because Cas9 nickase with paired sgRNAs within ~200 bp can introduce targeted DSBs<sup>3,4</sup>. As most bacteria do not possess a complete NHEJ system<sup>5-7</sup>, it makes the DSB a lethal event if no homology-directed repair (HDR) template is provided. It was thus reasoned that it is impossible to apply the strategy of introducing a close nick in the complementary strand in the NHEJ-deficient bacteria, like *E. coli*. To evaluate our hypothesis, we introduced another plasmid to deliver the designed complementary strand nicking sgRNA (nsgRNA). Two approaches for the secondary nick introduction were tested: nicking the non-edited strand within ~200 bp from the first nick (CRISPR-PE3) and nicking the non-edited strand only after the first nicked strand (the complementary strand) has been edited (CRISPR-PE3b). We designed editing events accordingly both in the plasmid-based system and the chromosome. As expected, for all three designed chromosomal DNA engineering and one plasmid DNA deletion of CRISPR-Prime Editing, almost no visible colonies were observed after the second nick was introduced (Supplementary Fig. 4).

**Supplementary Table 1. Plasmids and strains involved in this study**

| Plasmid               | Background                                                                                                                                                                                                                                          | Reference                   |
|-----------------------|-----------------------------------------------------------------------------------------------------------------------------------------------------------------------------------------------------------------------------------------------------|-----------------------------|
| pdCas9-bacteria       | <i>E. coli</i> codon optimized dCas9 is under control by a tetracycline inducible promoter; CamR; p15A ori                                                                                                                                          | Addgene #44249 <sup>8</sup> |
| pgRNA-bacteria        | sgRNA transcript carrying plasmid, under control by a constitutive promoter J23119; AmpR; ColE1 ori                                                                                                                                                 | Addgene #44251 <sup>8</sup> |
| pCDF-b1               | SmR; CloDF13 ori                                                                                                                                                                                                                                    | Millipore, US               |
| pCDF-GFPplus          | A fast folding GFP variant GFP+ is cloned into pCDF-b1 under control by a constitutive promoter                                                                                                                                                     | This study                  |
| pCRISPR-PE-bacteria   | pdCas9- bacteria is used as the backbone. An <i>E. coli</i> codon optimized fusion protein of Cas9n-linker-M-MLV2 is cloned into pdCas9- bacteria by replacing the dCas9. The fusion protein is under control by a tetracycline inducible promoter. | This study                  |
| pPEgRNA               | The 20 bp spacer was removed from pgRNA-bacteria. Therefore, this plasmid carries only a sgRNA scaffold without a spacer.                                                                                                                           | This study                  |
| pVRb20_992            | KanR; pSC101 ori; carrying a cassette of PEcf20_992-sfGFP                                                                                                                                                                                           | Addgene #49714 <sup>9</sup> |
| pnsgrNA               | An sgRNA transcript cassette from pgRNA-bacteria was inserted to replace the PEcf20_992-sfGFP cassette                                                                                                                                              | This study                  |
| pVRb_PEGRNA_312 Gdel  | pVRb_PEGRNA carries a 20 nt spacer targeting GFP coding gene, and a 3 prime extension for deleting the 312G, the length of both the reverse transcription template and the primer binding sequence is 13 bp                                         | This study                  |
| pPEgRNA_GFP_TAA in    | pPEgRNA carries a 20 nt spacer targeting GFP coding gene, and a 3 prime extension for inserting a stop codon TAA, the length of both the reverse transcription template and the primer binding sequence is 13 bp                                    | This study                  |
| pPEgRNA_GFP_TAA in_T4 | The same as pPEgRNA_GFP_TAAin, except that the length of the reverse transcription template is 4 bp                                                                                                                                                 | This study                  |
| pPEgRNA_GFP_TAA in_T5 | The same as pPEgRNA_GFP_TAAin, except that the length of the reverse transcription template is 5 bp                                                                                                                                                 | This study                  |

|                         |                                                                                                                                                                                                                                                                              |            |
|-------------------------|------------------------------------------------------------------------------------------------------------------------------------------------------------------------------------------------------------------------------------------------------------------------------|------------|
| pPEgRNA_GFP_TAAin_T8    | The same as pPEgRNA_GFP_TAAin, except that the length of the reverse transcription template is 8 bp                                                                                                                                                                          | This study |
| pPEgRNA_GFP_TAAin_T20   | The same as pPEgRNA_GFP_TAAin, except that the length of the reverse transcription template is 20 bp                                                                                                                                                                         | This study |
| pPEgRNA_GFP_TAAin_PBS5  | The same as pPEgRNA_GFP_TAAin, except that the length of the primer binding sequence is 5 bp                                                                                                                                                                                 | This study |
| pPEgRNA_GFP_TAAin_PBS8  | The same as pPEgRNA_GFP_TAAin, except that the length of the primer binding sequence is 8 bp                                                                                                                                                                                 | This study |
| pPEgRNA_GFP_TAAin_PBS17 | The same as pPEgRNA_GFP_TAAin, except that the length of the primer binding sequence is 17 bp                                                                                                                                                                                | This study |
| pPEgRNA_GFP_T198A       | pPEgRNA carries a 20 nt spacer targeting GFP coding gene, and a 3 prime extension for 198T to 198A substitution within the GFP coding gene, the length of both the reverse transcription template and the primer binding sequence is 13 bp                                   | This study |
| pPEgRNA_GFP_T196C_T198C | pPEgRNA carries a 20 nt spacer targeting GFP coding gene, and a 3 prime extension for 196T , 198T to 196C, 198C substitutions within the GFP coding gene, the length of both the reverse transcription template and the primer binding sequence is 13 bp                     | This study |
| pPEgRNA_GFP_198Tdel     | pPEgRNA carries a 20 nt spacer targeting GFP coding gene, and a 3 prime extension for 198T deletion within the GFP coding gene, the length of both the reverse transcription template and the primer binding sequence is 13 bp                                               | This study |
| pPEgRNA_GFP_combo       | pPEgRNA carries a 20 nt spacer targeting GFP coding gene, and a 3 prime extension for 198T to 198A substitution, TAA insertion, and 199G deletion within the GFP coding gene, the length of both the reverse transcription template and the primer binding sequence is 13 bp | This study |
| pPEgRNA_GFP_12in        | pPEgRNA carries a 20 nt spacer targeting GFP coding gene, and a 3 prime extension for insertion of a 12 bp fragment within the GFP coding gene, the length of both the reverse transcription template and the primer binding sequence is 13 bp                               | This study |
| pPEgRNA_GFP_18in        | pPEgRNA carries a 20 nt spacer targeting GFP coding gene, and a 3 prime extension for insertion of a 18 bp fragment within the GFP coding gene, the length of both the reverse transcription template and the primer binding sequence is 13 bp                               | This study |

|                        |                                                                                                                                                                                                                                                                                  |            |
|------------------------|----------------------------------------------------------------------------------------------------------------------------------------------------------------------------------------------------------------------------------------------------------------------------------|------------|
| pPEgRNA_GFP_33in       | pPEgRNA carries a 20 nt spacer targeting GFP coding gene, and a 3 prime extension for insertion of a 33 bp fragment within the GFP coding gene, the length of both the reverse transcription template and the primer binding sequence is 13 bp                                   | This study |
| pPEgRNA_GFP_10del      | pPEgRNA carries a 20 nt spacer targeting GFP coding gene, and a 3 prime extension for deletion of a 10 bp fragment within the GFP coding gene, the length of both the reverse transcription template and the primer binding sequence is 13 bp                                    | This study |
| pPEgRNA_GFP_23del      | pPEgRNA carries a 20 nt spacer targeting GFP coding gene, and a 3 prime extension for deletion of a 23 bp fragment within the GFP coding gene, the length of both the reverse transcription template and the primer binding sequence is 13 bp                                    | This study |
| pPEgRNA_GFP_36del      | pPEgRNA carries a 20 nt spacer targeting GFP coding gene, and a 3 prime extension for deletion of a 36 bp fragment within the GFP coding gene, the length of both the reverse transcription template and the primer binding sequence is 13 bp                                    | This study |
| pPEgRNA_GFP_49del      | pPEgRNA carries a 20 nt spacer targeting GFP coding gene, and a 3 prime extension for deletion of a 49 bp fragment within the GFP coding gene, the length of both the reverse transcription template and the primer binding sequence is 13 bp                                    | This study |
| pPEgRNA_GFP_97del      | pPEgRNA carries a 20 nt spacer targeting GFP coding gene, and a 3 prime extension for deletion of a 97 bp fragment within the GFP coding gene, the length of both the reverse transcription template and the primer binding sequence is 13 bp                                    | This study |
| pPEgRNA_lacZ_TAGin     | pPEgRNA carries a 20 nt spacer targeting <i>lacZ</i> gene, and a 3 prime extension for TAG insertion into the <i>lacZ</i> gene for a stop codon introduction, the length for the reverse transcription template and the primer binding sequence is 16 bp and 13 bp, respectively | This study |
| pPEgRNA_lacZ_CGdel     | pPEgRNA carries a 20 nt spacer targeting <i>lacZ</i> gene, and a 3 prime extension for CG deletion in the <i>lacZ</i> gene for a stop codon introduction, the length for the reverse transcription template and the primer binding sequence is 18 bp and 14 bp, respectively     | This study |
| pPEgRNA_lacZ_GTtoTAsub | pPEgRNA carries a 20 nt spacer targeting <i>lacZ</i> gene, and a 3 prime extension for GT to TA substitution in the <i>lacZ</i> gene for a stop codon introduction, the length of both the reverse transcription template and the primer binding sequence is 14 bp               | This study |
| pPEgRNA_galK_TAAin     | pPEgRNA carries a 20 nt spacer targeting <i>galK</i> gene, and a 3 prime extension for TAG insertion into the <i>galK</i> gene for a stop codon introduction, the length for the reverse transcription template and the primer binding sequence is 16 bp and 13 bp, respectively | This study |

|                                              |                                                                                                                                                                                                                                                                                                                         |                              |
|----------------------------------------------|-------------------------------------------------------------------------------------------------------------------------------------------------------------------------------------------------------------------------------------------------------------------------------------------------------------------------|------------------------------|
| pnsgrNA_GFP_TAAin                            | pnsgrNA carries a 20 nt spacer that pairs with pPEgRNA_GFP_TAAin to introduce the second nick                                                                                                                                                                                                                           | This study                   |
| pnsgrNA_lacZ_TAGin                           | pnsgrNA carries a 20 nt spacer that pairs with pPEgRNA_lacZ_TAGin to introduce the second nick                                                                                                                                                                                                                          | This study                   |
| pnsgrNA_lacZ_CGdel                           | pnsgrNA carries a 20 nt spacer that pairs with pPEgRNA_lacZ_CGdel to introduce the second nick                                                                                                                                                                                                                          | This study                   |
| pnsgrNA_lacZ_GTtoTASub                       | pnsgrNA carries a 20 nt spacer that pairs with pPEgRNA_lacZ_GTtoTASub to introduce the second nick                                                                                                                                                                                                                      | This study                   |
| <b>Strain</b>                                | <b>Background</b>                                                                                                                                                                                                                                                                                                       | <b>Reference</b>             |
| <i>Escherichia coli</i> DH10 $\beta$ (DH10B) | str. K F- mcrA $\Delta$ (mrr-hsdRMS-mcrBC) $\phi$ 80lacZ $\Delta$ M15 $\Delta$ lacX74 recA1 endA1 araD139 $\Delta$ (ara, leu)7697 galU galK $\lambda$ - rpsL nupG /pMON14272 / pMON7124. Whole-genome sequenced for parental strain characterization. The sequencing data can be found under SRA Accession: SRR15371477 | Thermo Fisher Scientific, US |
| <i>Escherichia coli</i> MG1655               | Str. K F-, lambda-, rph-1. Whole-genome sequenced for parental strain characterization. The sequencing data can be found under SRA Accession: SRR15371770                                                                                                                                                               | Maintained in lab            |
| PE0001                                       | <i>E. coli</i> DH10 $\beta$ carries pCDF-GFPplus                                                                                                                                                                                                                                                                        | This study                   |
| PE0002                                       | <i>E. coli</i> DH10 $\beta$ carries pCRISPR-PE-bacteria                                                                                                                                                                                                                                                                 | This study                   |
| PE0003                                       | <i>E. coli</i> DH10 $\beta$ carries pCRISPR-PE-bacteria and pCDF-GFPplus                                                                                                                                                                                                                                                | This study                   |
| PE0004                                       | <i>E. coli</i> DH10 $\beta$ carries pCRISPR-PE-bacteria, pCDF-GFPplus, and pPEgRNA                                                                                                                                                                                                                                      | This study                   |
| PE0005                                       | <i>E. coli</i> DH10 $\beta$ carries pCRISPR-PE-bacteria, pCDF-GFPplus, and pPEgRNA_GFP_TAAin. Whole-genome sequenced for mutation analysis. The sequencing data can be found under SRA Accession: SRR15371494                                                                                                           | This study                   |
| PE0006                                       | <i>E. coli</i> DH10 $\beta$ carries pCRISPR-PE-bacteria, pCDF-GFPplus, and pPEgRNA_GFP_TAAin_T4                                                                                                                                                                                                                         | This study                   |

|        |                                                                                                                                                                                                                         |            |
|--------|-------------------------------------------------------------------------------------------------------------------------------------------------------------------------------------------------------------------------|------------|
| PE0007 | <i>E. coli</i> DH10 $\beta$ carries pCRISPR-PE-bacteria, pCDF-GFPplus, and pPEgRNA_GFP_TAAin_T5                                                                                                                         | This study |
| PE0008 | <i>E. coli</i> DH10 $\beta$ carries pCRISPR-PE-bacteria, pCDF-GFPplus, and pPEgRNA_GFP_TAAin_T8                                                                                                                         | This study |
| PE0009 | <i>E. coli</i> DH10 $\beta$ carries pCRISPR-PE-bacteria, pCDF-GFPplus, and pPEgRNA_GFP_TAAin_T20                                                                                                                        | This study |
| PE0010 | <i>E. coli</i> DH10 $\beta$ carries pCRISPR-PE-bacteria, pCDF-GFPplus, and pPEgRNA_GFP_TAAin_PBS5                                                                                                                       | This study |
| PE0011 | <i>E. coli</i> DH10 $\beta$ carries pCRISPR-PE-bacteria, pCDF-GFPplus, and pPEgRNA_GFP_TAAin_PBS8                                                                                                                       | This study |
| PE0012 | <i>E. coli</i> DH10 $\beta$ carries pCRISPR-PE-bacteria, pCDF-GFPplus, and pPEgRNA_GFP_TAAin_PBS17                                                                                                                      | This study |
| PE0013 | <i>E. coli</i> DH10 $\beta$ carries pCRISPR-PE-bacteria, pCDF-GFPplus, and pPEgRNA_GFP_T198A. Clone #1. Whole-genome sequenced for mutation analysis. The sequencing data can be found under SRA Accession: SRR15371482 | This study |
| PE0014 | <i>E. coli</i> DH10 $\beta$ carries pCRISPR-PE-bacteria, pCDF-GFPplus, and pPEgRNA_GFP_T198A. Clone #2. Whole-genome sequenced for mutation analysis. The sequencing data can be found under SRA Accession: SRR15371480 | This study |
| PE0015 | <i>E. coli</i> DH10 $\beta$ carries pCRISPR-PE-bacteria, pCDF-GFPplus, and pPEgRNA_GFP_T196C_T198C. Whole-genome sequenced for mutation analysis. The sequencing data can be found under SRA Accession: SRR15371479     | This study |
| PE0016 | <i>E. coli</i> DH10 $\beta$ carries pCRISPR-PE-bacteria, pCDF-GFPplus, and pPEgRNA_GFP_198Tdel. Whole-genome sequenced for mutation analysis. The sequencing data can be found under SRA Accession: SRR15371493         | This study |
| PE0017 | <i>E. coli</i> DH10 $\beta$ carries pCRISPR-PE-bacteria, pCDF-GFPplus, and pPEgRNA_GFP_combo. Whole-genome sequenced for mutation analysis. The sequencing data can be found under SRA Accession: SRR15371478           | This study |
| PE0018 | <i>E. coli</i> DH10 $\beta$ carries pCRISPR-PE-bacteria, pCDF-GFPplus, and pPEgRNA_GFP_12in                                                                                                                             | This study |

|        |                                                                                                                                                                                               |            |
|--------|-----------------------------------------------------------------------------------------------------------------------------------------------------------------------------------------------|------------|
| PE0019 | <i>E. coli</i> DH10 $\beta$ carries pCRISPR-PE-bacteria, pCDF-GFPplus, and pPEgRNA_GFP_18in                                                                                                   | This study |
| PE0020 | <i>E. coli</i> DH10 $\beta$ carries pCRISPR-PE-bacteria, pCDF-GFPplus, and pPEgRNA_GFP_33in                                                                                                   | This study |
| PE0021 | <i>E. coli</i> DH10 $\beta$ carries pCRISPR-PE-bacteria, pCDF-GFPplus, and pPEgRNA_GFP_10del                                                                                                  | This study |
| PE0022 | <i>E. coli</i> DH10 $\beta$ carries pCRISPR-PE-bacteria, pCDF-GFPplus, and pPEgRNA_GFP_23del                                                                                                  | This study |
| PE0023 | <i>E. coli</i> DH10 $\beta$ carries pCRISPR-PE-bacteria, pCDF-GFPplus, and pPEgRNA_GFP_36del                                                                                                  | This study |
| PE0024 | <i>E. coli</i> DH10 $\beta$ carries pCRISPR-PE-bacteria, pCDF-GFPplus, and pPEgRNA_GFP_49del                                                                                                  | This study |
| PE0025 | <i>E. coli</i> DH10 $\beta$ carries pCRISPR-PE-bacteria, pCDF-GFPplus, and pPEgRNA_GFP_97del                                                                                                  | This study |
| PE0026 | <i>E. coli</i> MG1655 carries pCRISPR-PE-bacteria and pPEgRNA_lacZ_TAGin. Whole-genome sequenced for mutation analysis. The sequencing data can be found under SRA Accession: SRR15371774     | This study |
| PE0027 | <i>E. coli</i> MG1655 carries pCRISPR-PE-bacteria and pPEgRNA_lacZ_CGdel. Whole-genome sequenced for mutation analysis. The sequencing data can be found under SRA Accession: SRR15371773     | This study |
| PE0028 | <i>E. coli</i> MG1655 carries pCRISPR-PE-bacteria and pPEgRNA_lacZ_GTtoTAsub. Whole-genome sequenced for mutation analysis. The sequencing data can be found under SRA Accession: SRR15371772 | This study |
| PE0029 | <i>E. coli</i> MG1655 carries pCRISPR-PE-bacteria, pPEgRNA_galk_TAAin. Whole-genome sequenced for mutation analysis. The sequencing data can be found under SRA Accession: SRR15371771        | This study |
| PE0030 | <i>E. coli</i> DH10 $\beta$ carries pCRISPR-PE-bacteria, pCDF-GFPplus, pPEgRNA_GFP_TAAin, and pVRb_PEGRNA_312Gdel                                                                             | This study |
| PE0031 | <i>E. coli</i> DH10 $\beta$ carries pCRISPR-PE-bacteria, pCDF-GFPplus, pPEgRNA_GFP_198Tdel, and pVRb_PEGRNA_312Gdel                                                                           | This study |



|        |                                                                                                                                                                                                                                                                                                             |            |
|--------|-------------------------------------------------------------------------------------------------------------------------------------------------------------------------------------------------------------------------------------------------------------------------------------------------------------|------------|
| PE0032 | <i>E. coli</i> DH10 $\beta$ carries pCRISPR-PE-bacteria, pCDF-GFPplus, pPEgRNA_GFP_T198A, and pVRb_PEGRNA_312Gdel                                                                                                                                                                                           | This study |
| PE0033 | <i>E. coli</i> DH10 $\beta$ carries pCRISPR-PE-bacteria, pCDF-GFPplus, pPEgRNA_GFP_combo, and pVRb_PEGRNA_312Gdel                                                                                                                                                                                           | This study |
| PE0034 | <i>E. coli</i> DH10 $\beta$ carries pCRISPR-PE-bacteria, pCDF-GFPplus, pPEgRNA_GFP_T196C_T198C, and pVRb_PEGRNA_312Gdel                                                                                                                                                                                     | This study |
| PE0035 | <i>E. coli</i> DH10 $\beta$ carries pCRISPR-PE-bacteria, pCDF-GFPplus, and pPEgRNA_GFP_198Tdel. Under induction, it is green (GFP expressed). Whole-genome sequenced for mutation analysis to find clues of editing escaping. Escaper #1. The sequencing data can be found under SRA Accession: SRR15371476 | This study |
| PE0036 | <i>E. coli</i> DH10 $\beta$ carries pCRISPR-PE-bacteria, pCDF-GFPplus, and pPEgRNA_GFP_198Tdel. Under induction, it is green (GFP expressed). Whole-genome sequenced for mutation analysis to find clues of editing escaping. Escaper #2. The sequencing data can be found under SRA Accession: SRR15371475 | This study |
| PE0037 | <i>E. coli</i> DH10 $\beta$ carries pCRISPR-PE-bacteria, pCDF-GFPplus, and pPEgRNA_GFP_198Tdel. Under induction, it is green (GFP expressed). Whole-genome sequenced for mutation analysis to find clues of editing escaping. Escaper #3. The sequencing data can be found under SRA Accession: SRR15371474 | This study |
| PE0038 | <i>E. coli</i> DH10 $\beta$ carries pCRISPR-PE-bacteria, pCDF-GFPplus, and pPEgRNA_GFP_198Tdel. Under induction, it is green (GFP expressed). Whole-genome sequenced for mutation analysis to find clues of editing escaping. Escaper #4. The sequencing data can be found under SRA Accession: SRR15371492 | This study |
| PE0039 | <i>E. coli</i> DH10 $\beta$ carries pCRISPR-PE-bacteria, pCDF-GFPplus, and pPEgRNA_GFP_198Tdel. Under induction, it is green (GFP expressed). Whole-genome sequenced for mutation analysis to find clues of editing escaping. Escaper #5. The sequencing data can be found under SRA Accession: SRR15371491 | This study |
| PE0040 | <i>E. coli</i> DH10 $\beta$ carries pCRISPR-PE-bacteria, pCDF-GFPplus, and pPEgRNA_GFP_198Tdel. Under induction, it is green (GFP expressed). Whole-genome sequenced for mutation analysis to find clues of editing escaping. Escaper #6. The sequencing data can be found under SRA Accession: SRR15371490 | This study |
| PE0041 | <i>E. coli</i> DH10 $\beta$ carries pCRISPR-PE-bacteria, pCDF-GFPplus, and pPEgRNA_GFP_198Tdel. Under induction, it is green (GFP expressed). Whole-genome sequenced for mutation analysis to find clues of editing escaping.                                                                               | This study |

|        |                                                                                                                                                                                                                                                                                                              |            |
|--------|--------------------------------------------------------------------------------------------------------------------------------------------------------------------------------------------------------------------------------------------------------------------------------------------------------------|------------|
|        | Escaper #7. The sequencing data can be found under SRA Accession: SRR15371489                                                                                                                                                                                                                                |            |
| PE0042 | <i>E. coli</i> DH10 $\beta$ carries pCRISPR-PE-bacteria, pCDF-GFPplus, and pPEgRNA_GFP_198Tdel. Under induction, it is green (GFP expressed). Whole-genome sequenced for mutation analysis to find clues of editing escaping. Escaper #8. The sequencing data can be found under SRA Accession: SRR15371488  | This study |
| PE0043 | <i>E. coli</i> DH10 $\beta$ carries pCRISPR-PE-bacteria, pCDF-GFPplus, and pPEgRNA_GFP_198Tdel. Under induction, it is green (GFP expressed). Whole-genome sequenced for mutation analysis to find clues of editing escaping. Escaper #9. The sequencing data can be found under SRA Accession: SRR15371487  | This study |
| PE0044 | <i>E. coli</i> DH10 $\beta$ carries pCRISPR-PE-bacteria, pCDF-GFPplus, and pPEgRNA_GFP_198Tdel. Under induction, it is green (GFP expressed). Whole-genome sequenced for mutation analysis to find clues of editing escaping. Escaper #10. The sequencing data can be found under SRA Accession: SRR15371486 | This study |
| PE0045 | <i>E. coli</i> DH10 $\beta$ carries pCDF-GFPplus. Induced. Whole-genome sequenced as a control. The sequencing data can be found under SRA Accession: SRR15371485                                                                                                                                            | This study |
| PE0046 | <i>E. coli</i> DH10 $\beta$ carries pCRISPR-PE-bacteria. Induced. Whole-genome sequenced as a control. The sequencing data can be found under SRA Accession: SRR15371484                                                                                                                                     | This study |
| PE0047 | <i>E. coli</i> DH10 $\beta$ carries pCDF-GFPplus and pCRISPR-PE-bacteria. Induced. Whole-genome sequenced as a control. The sequencing data can be found under SRA Accession: SRR15371483                                                                                                                    | This study |
| PE0048 | <i>E. coli</i> DH10 $\beta$ carries pCDF-GFPplus, pCRISPR-PE-bacteria, and a pPEgRNA without the 26-bp 3 prime extension. Induced, the clone is green. Whole-genome sequenced as a control. The sequencing data can be found under SRA Accession: SRR15371481                                                | This study |

**Supplementary Table 2. Primers used in this study**

| Names                        | Sequence (5' to 3')                                                            | Purpose                                                                                                                  |
|------------------------------|--------------------------------------------------------------------------------|--------------------------------------------------------------------------------------------------------------------------|
| PEgRNA_GFP_F                 | gtcctaggtataataactagtCTTGTCACACTACTCTGACCTAgttttaga<br>gctagaaatagc            | For PCR amplification of desired PEgRNA functional cassettes. Sequences in lower case are overhangs for Gibson assembly. |
| PEgRNA_GFP_TA<br>Ain_R       | gggccaagcttcaaaaaaTCACTACTCTGACCTATTAAGGT<br>GTTCAAgcaccgactcggtgccactt        |                                                                                                                          |
| PEgRNA_GFP_TA<br>Ain_T4_R    | gggccaagcttcaaaaaaTCACTACTCTGACCTATTAAgcac<br>cgactcggtgccactt                 |                                                                                                                          |
| PEgRNA_GFP_TA<br>Ain_T5_R    | gggccaagcttcaaaaaaTCACTACTCTGACCTATTAAGgc<br>accgactcggtgccactt                |                                                                                                                          |
| PEgRNA_GFP_TA<br>Ain_T8_R    | gggccaagcttcaaaaaaTCACTACTCTGACCTATTAAGGT<br>Ggcaccgactcggtgccactt             |                                                                                                                          |
| PEgRNA_GFP_TA<br>Ain_T20_R   | gggccaagcttcaaaaaaTCACTACTCTGACCTATTAAGGT<br>GTTCAATGCTTTTgcaccgactcggtgccactt |                                                                                                                          |
| PEgRNA_GFP_TA<br>Ain_PBS5_R  | gggccaagcttcaaaaaaCTGACCTATTAAGGTGTTCAAgca<br>ccgactcggtgccactt                |                                                                                                                          |
| PEgRNA_GFP_TA<br>Ain_PBS8_R  | gggccaagcttcaaaaaaACTCTGACCTATTAAGGTGTTCA<br>Agcaccgactcggtgccactt             |                                                                                                                          |
| PEgRNA_GFP_TA<br>Ain_PBS17_R | gggccaagcttcaaaaaaACTCTGACCTATTAAGGTGTTCA<br>Agcaccgactcggtgccactt             |                                                                                                                          |
| PEgRNA_GFP_T1<br>98A_R       | gggccaagcttcaaaaaaTCACTACTCTGACCTAAGGTGTT<br>CAAgcaccgactcggtgccactt           |                                                                                                                          |
| PEgRNA_GFP_T1<br>96C_T198C_R | gggccaagcttcaaaaaaTCACTACTCTGACCCACGGTGT<br>TCAAgcaccgactcggtgccactt           |                                                                                                                          |

|                            |                                                                                                           |                                                                                          |
|----------------------------|-----------------------------------------------------------------------------------------------------------|------------------------------------------------------------------------------------------|
| PEgRNA_GFP_19<br>8Tdel_R   | gggccaagcttcaaaaaaTCACTACTCTGACCTAGGTGTT<br>CAATgcaccgactcgggtgccactt                                     |                                                                                          |
| PEgRNA_GFP_co<br>mbo_R     | gggccaagcttcaaaaaaTCACTACTCTGACCTAATAAGTG<br>TTCAGcaccgactcgggtgccactt                                    |                                                                                          |
| PEgRNA_GFP_12i<br>n_R      | gggccaagcttcaaaaaaTCACTACTCTGACCTATGTAATC<br>TGACAGGTGTTCAAgcaccgactcgggtgccactt                          |                                                                                          |
| PEgRNA_GFP_18i<br>n_R      | gggccaagcttcaaaaaaTCACTACTCTGACCTATTAATAC<br>GACTCACTATAGGGTGTTCAGcaccgactcgggtgccactt                    |                                                                                          |
| PEgRNA_GFP_33i<br>n_R      | gggccaagcttcaaaaaaTCACTACTCTGACCTATTGTAGA<br>ATCAGCCACGAAACCGAGCGGGCGAGGGTGTTCAA<br>gcaccgactcgggtgccactt |                                                                                          |
| PEgRNA_GFP_10<br>del_R     | gggccaagcttcaaaaaaTCACTACTCTGACATATCTTTCA<br>AAGgcaccgactcgggtgccactt                                     |                                                                                          |
| PEgRNA_GFP_23<br>del_R     | gggccaagcttcaaaaaaTCACTACTCTGACATATCTTTCA<br>AAGgcaccgactcgggtgccactt                                     |                                                                                          |
| PEgRNA_GFP_36<br>del_R     | gggccaagcttcaaaaaaTCACTACTCTGACATATCTTTCA<br>AAGgcaccgactcgggtgccactt                                     |                                                                                          |
| PEgRNA_GFP_49<br>del_R     | gggccaagcttcaaaaaaTCACTACTCTGACATATCTTTCA<br>AAGgcaccgactcgggtgccactt                                     |                                                                                          |
| PEgRNA_GFP_97<br>del_R     | gggccaagcttcaaaaaaTCACTACTCTGACATATCTTTCA<br>AAGgcaccgactcgggtgccactt                                     |                                                                                          |
| PEgRNA_GFP_31<br>2Gdel_F   | gtcctaggtataatactagtCTATATCTTTCAAAGATGACgttttaga<br>gctagaaatagc                                          | For PCR<br>amplification of<br>GFP 312G<br>deletion<br>PEgRNA for<br>Gibson<br>assembly. |
| PEgRNA_GFP_31<br>2Gdel_R   | gggccaagcttcaaaaaaATCTTTCAAAGATGACGGAACTA<br>CAAGCACCGACTCGGTGCCACTT                                      |                                                                                          |
| pVRb_PEGRNA_ba<br>ckbone_F | TTTTTTTGAAGCTTGGGCCC                                                                                      | For PCR<br>amplification of<br>plasmid                                                   |

|                          |                                                                              |                                                                                                                                         |
|--------------------------|------------------------------------------------------------------------------|-----------------------------------------------------------------------------------------------------------------------------------------|
| pVRb_PEGRNA_backbone_R   | ACTAGTATTATACCTAGGACTGAGC                                                    | backbone for Gibson assembly of PEGRNA.                                                                                                 |
| pPEGRNA_lacZ_TAGin_F     | gtcctaggtataataactagtAATCCCGAATCTCTATCGTGggttttag<br>agctagaaatagc           | For PCR amplification of desired functional PEGRNA_lacZ_TAGin cassettes. Sequences in lower case are overhangs for Gibson assembly.     |
| pPEGRNA_lacZ_TAGin_R     | gggccaagcttcaaaaaaCCGAATCTCTATCGTGCGTAGG<br>TGGTTGA<br>gcaccgactcgggtgccactt |                                                                                                                                         |
| pPEGRNA_lacZ_CGdel_F     | gtcctaggtataataactagtTATGCAGCAACGAGACGTCAGttttag<br>agctagaaatagc            | For PCR amplification of desired functional PEGRNA_lacZ_CGdel cassettes. Sequences in lower case are overhangs for Gibson assembly.     |
| pPEGRNA_lacZ_CGdel_R     | gggccaagcttcaaaaaaGCAGCAACGAGACGTCAGAAAA<br>TGCCGCTCATgcaccgactcgggtgccactt  |                                                                                                                                         |
| pPEGRNA_lacZ_GTtoTASub_F | gtcctaggtataataactagtGCGAGTTGCGTGACTACCTAGttttag<br>agctagaaatagc            | For PCR amplification of desired functional PEGRNA_lacZ_GTtoTASub cassettes. Sequences in lower case are overhangs for Gibson assembly. |
| pPEGRNA_lacZ_GTtoTASub_R | gggccaagcttcaaaaaaAGTTGCGTGACTACTAACGGGT<br>AACAGTgcaccgactcgggtgccactt      |                                                                                                                                         |
| pPEGRNA_galK_TAAin_F     | gtcctaggtataataactagtGACAGCCACACCTTTGGGCAggttttag<br>agctagaaatagc           | For PCR amplification of desired functional PEGRNA_galK_TAAin cassettes. Sequences in lower case are overhangs for Gibson assembly.     |
| pPEGRNA_galK_TAAin_R     | gggccaagcttcaaaaaaGCCACACCTTTGGGCATTTAGG<br>AAACTGCgcaccgactcgggtgccactt     |                                                                                                                                         |
| lacZ_check_F             | gatgaaagctggctacagga                                                         | For PCR amplification of the targeted                                                                                                   |

|                              |                                              |                                                                                                                          |
|------------------------------|----------------------------------------------|--------------------------------------------------------------------------------------------------------------------------|
| lacZ_check_F                 | tgacggttaacgcctcgaat                         | region in <i>lacZ</i> gene. The forward primer is also used for Sanger sequencing.                                       |
| galK_check_F                 | caatgggctaactacgttcg                         | For PCR amplification of the targeted region in <i>galK</i> gene. The forward primer is also used for Sanger sequencing. |
| galK_check_F                 | gtcgccaatcacagctttga                         |                                                                                                                          |
| pnsgRNA_GFP_TA<br>Ain_F      | AAAGCATTGAACACcttaATGTTTTAGAGCTAGAAATAG<br>C | For PCR amplification of the <i>pnsgRNA_GFP_TA</i> cassette.                                                             |
| pnsgRNA_GFP_TA<br>Ain_R      | ATtaaGGTGTTCAATGCTTTactagtattatacctaggac     |                                                                                                                          |
| pnsgRNA_lacZ_TA<br>Gin_F     | CctaCGCACGATAGAGATTCGTTTTAGAGCTAGAAATA<br>GC | For PCR amplification of the <i>pnsgRNA_lacZ_TA</i> cassette.                                                            |
| pnsgRNA_lacZ_TA<br>Gin_R     | GAATCTCTATCGTGCGtagGactagtattatacctaggac     |                                                                                                                          |
| pnsgRNA_lacZ_CG<br>del_F     | CTGGAGTGACGGCAGTTATCGTTTTAGAGCTAGAAAT<br>AGC | For PCR amplification of the <i>pnsgRNA_lacZ_CG</i> cassette.                                                            |
| pnsgRNA_lacZ_CG<br>del_R     | GATAACTGCCGTCCTCCAGactagtattatacctaggac      |                                                                                                                          |
| pnsgRNA_lacZ_GT<br>toTASub_F | CATTAAAGCGAGTGGCAACAGTTTTAGAGCTAGAAAT<br>AGC | For PCR amplification of the <i>pnsgRNA_lacZ_GT</i> cassette.                                                            |
| pnsgRNA_lacZ_GT<br>toTASub_R | TGTTGCCACTCGCTTTAATGactagtattatacctaggac     |                                                                                                                          |

|                   |                                           |                                                                                                         |
|-------------------|-------------------------------------------|---------------------------------------------------------------------------------------------------------|
| pVRb_backbone_F   | CTGTTGTTTGTCCGGTGAACG                     | For PCR amplification of the pVRb backbone from pVRb_20_992.                                            |
| pVRb_backbone_R   | AAGGGCCTCGTGATACGCCT                      |                                                                                                         |
| sgRNA_cassette_F  | AGGCGTATCACGAGGCCCTTgaattctaagatctttgac   | For PCR amplification of the sgRNA cassette from pPEgRNA.                                               |
| sgRNA_cassette_R  | CGTTCACCGACAAACAACAGataaaacgaaaggcccagtc  |                                                                                                         |
| nsgRNA_seq        | GCAATTCCGACGTCTAAG                        | For validation of the Gibson assembly of pnsgrNA. Also for validation of PEgRNA cloning of pVRb_PEgRNA. |
| PEgRNA_backbone_F | TTTTTTTGAAGCTTGGGCCC                      | For PCR amplification of the pPEgRNA backbone                                                           |
| PEgRNA_backbone_R | ACTAGTATTATACCTAGGAC                      |                                                                                                         |
| PEgRNA_F          | GTCCTAGGTATAATACTAGTGTTTTAGAGCTAGAAATAGCA | For removal of the 20 bp spacer from the plasmid pgRNA-bacteria.                                        |
| PEgRNA_R          | ACTAGTATTATACCTAGGACTGAGCTAGCT            |                                                                                                         |
| PEgRNA_Seq        | AATAGGCGTATCACGAGGCA                      | For Sanger sequencing of correctly assembled PEgRNA plasmids.                                           |
| pCDF-GFP_Seq      | GAAATACTAGATGAGCAAAGGAGAAG                | For screening of edited events using Sanger sequencing.                                                 |

|                 |                                          |                                                                                                                                 |
|-----------------|------------------------------------------|---------------------------------------------------------------------------------------------------------------------------------|
| pCDF-1b_F       | GTATATCTCCTTATTAAGT                      | For PCR amplification of the pCDF-1b backbone.                                                                                  |
| pCDF-1b_R       | ATTAACCTAGGCTGCTGCCA                     |                                                                                                                                 |
| GFPplus_F       | ACTTTAATAAGGAGATATACTTTACGGCTAGCTCAGTCCT | For PCR amplification of the J23106-GFPplus-T0 cassette.                                                                        |
| GFPplus_R       | TGGCAGCAGCCTAGGTTAATCGAACCGAACAGGCTTATGT |                                                                                                                                 |
| GFPplus_check_F | ATGCGACTCCTGCATTAGGA                     | For screening of correctly assembled pCDF-GFPplus using PCR. The GFPplus_check_F is also used for Sanger sequencing validation. |
| GFPplus_check_R | ACTAGTCGCCAGGGTTTTCC                     |                                                                                                                                 |
| A10D_F          | TAGGCTTAGATATCGGCACAAA                   | For site-directed mutating of 10A to 10D with the dCas9 in the pdCas9-bacteria.                                                 |
| A10D_R          | TTGAGTATTTCTTATCCATATG                   |                                                                                                                                 |
| D10_Seq         | GCGAGTTTACGGGTTGTTA                      | For screening of correct mutations of 10A to 10D using Sanger sequencing.                                                       |
| pCas9n_F        | TAACTCGAGTAAGGATCTCC                     | For PCR amplification of the pCas9n(H840A) backbone, the stop codon of Cas9n is removed.                                        |
| pCas9n_R        | GTCACCTCCTAGCTGACTCA                     |                                                                                                                                 |



|                 |                      |                                                                                                                                                               |
|-----------------|----------------------|---------------------------------------------------------------------------------------------------------------------------------------------------------------|
| EcMMLV2_F       | TGAGTCAGCTAGGAGGTGAC | For PCR amplification of the <i>E. coli</i> codon optimized linker-M-MLV2 fragment.                                                                           |
| EcMMLV2_R       | GGAGATCCTTACTCGAGTTA |                                                                                                                                                               |
| EcMMLV2_check_R | AACAAACAGCTCGAACGGCT | Together with EcMMLV2_F, this primer set is used for PCR screening of <i>E. coli</i> codon optimized linker-M-MLV2 fragment insertion.                        |
| EcMMLV2_seq     | AACTGGATTGCCAACAGGGT | Together with EcMMLV2_F, these three primers are used to confirm the insertion of <i>E. coli</i> codon optimized linker-M-MLV2 fragment by Sanger sequencing. |
| dblTerm_R_seq   | GAAGGTGAGCCAGTGTGACT |                                                                                                                                                               |

**Supplementary Table 3. Important sequences involved in this study**

| Name                       | Sequence                                                                                                                                                                                                                                                                                                                                                                                                                                                                                                                                                                                                                                                                                                                                                                                                                                                                                                                                                                                                                                                                                                                                                                                                                                                                        | Description                                                                                                                                                         |
|----------------------------|---------------------------------------------------------------------------------------------------------------------------------------------------------------------------------------------------------------------------------------------------------------------------------------------------------------------------------------------------------------------------------------------------------------------------------------------------------------------------------------------------------------------------------------------------------------------------------------------------------------------------------------------------------------------------------------------------------------------------------------------------------------------------------------------------------------------------------------------------------------------------------------------------------------------------------------------------------------------------------------------------------------------------------------------------------------------------------------------------------------------------------------------------------------------------------------------------------------------------------------------------------------------------------|---------------------------------------------------------------------------------------------------------------------------------------------------------------------|
| J23106-GFPplus-T0 cassette | <p>TTTACGGCTAGCTCAGTCCT<br/> AGGTATAGTGCTAGCTACTA<br/> GAGAAAGAGGAGAAATACTA<br/> GATGAGCAAAGGAGAAGAA<br/> CTTTTCACTGGAGTTGTCCC<br/> AATTCTTGTTGAATTAGATG<br/> GTGATGTTAATGGGCACAAA<br/> TTTTCTGTCAGTGGAGAGGG<br/> TGAAGGTGATGCTACATACG<br/> GAAAACTCACCTTAAATTT<br/> ATTTGCACTACTGGAAACT<br/> ACCTGTTCCATGGCCAACAC<br/> TTGTCACTACTCTGACCTAT<br/> GGTGTTCAATGCTTTTCCCG<br/> TTATCCGGATCACATGAAAC<br/> GGCATGACTTTTTCAAGAGT<br/> GCCATGCCCGAAGGTTATGT<br/> ACAGGAACGCACTATATCTT<br/> TCAAAGATGACGGGAACTAC<br/> AAGACGCGTGCTGAAGTCA<br/> AGTTTGAAGGTGATACCCTT<br/> GTTAATCGTATCGAGTAAA<br/> GGGTATTGATTTTAAAGAAG<br/> ATGGAAACATTCTCGGACAC<br/> AACTAGAGTACAATAA<br/> CTCACACAATGTATACATCA<br/> CGGCAGACAAACAAAAGAAT<br/> GGAATCAAAGCTAACTTCAA<br/> AATTCGCCACAACATTGAAG<br/> ATGGTTCCGTTCAACTAGCA<br/> GACCATTATCAACAAAATAC<br/> TCCAATTGGCGATGGCCCT<br/> GTCCTTTTACCAGACAACCA<br/> TTACCTGTGACACAATCTG<br/> CCTTTTCGAAAGATCCCAAC<br/> GAAAAGCGTGACCACATGG<br/> TCCTTCTTGAGTTTGTA<br/> ACTGCTGCTGGGATTACACATG<br/> GCATGGATGAGCTCTACAAA<br/> TGAAGCGCATACCTGCAGG<br/> CATGCAAGCTTGCGGCCGC<br/> GTCGTGACTGGGAAAACCC<br/> TGGCGACTAGTCTTGGACTC<br/> CTGTTGATAGATCCAGTAAT<br/> GACCTCAGAACTCCATCTGG<br/> ATTTGTTCAGAACGCTCGGT<br/> TGCCGCCGGCGTTTTTTAT<br/> TGGTGAGAATCCAGGGGTC</p> | <p>A fast folding GFP variant GFP+ encoding gene (in blue), controlled by a constitutive promoter J23106 (in green) and ended with a T0 terminator (in orange).</p> |

|                                                              |                                                                                                                                                                                                                                                                                                                                                                                                                                                                                                                                                                                                                                                                                                                                                                                                                                                                                                                                                                                                                                                                                                                                                                                                                                                              |                                                                                                                                                                            |
|--------------------------------------------------------------|--------------------------------------------------------------------------------------------------------------------------------------------------------------------------------------------------------------------------------------------------------------------------------------------------------------------------------------------------------------------------------------------------------------------------------------------------------------------------------------------------------------------------------------------------------------------------------------------------------------------------------------------------------------------------------------------------------------------------------------------------------------------------------------------------------------------------------------------------------------------------------------------------------------------------------------------------------------------------------------------------------------------------------------------------------------------------------------------------------------------------------------------------------------------------------------------------------------------------------------------------------------|----------------------------------------------------------------------------------------------------------------------------------------------------------------------------|
|                                                              | <p>CCCAATAATTACGATTTAAAT<br/>TTGACATAAGCCTGTTCCGGT<br/>TCG</p>                                                                                                                                                                                                                                                                                                                                                                                                                                                                                                                                                                                                                                                                                                                                                                                                                                                                                                                                                                                                                                                                                                                                                                                               |                                                                                                                                                                            |
| <p><i>E. coli</i> codon optimized linker-M-MLV2 fragment</p> | <p><i>TGAGTCAGCTAGGAGGTGA</i><br/><i>CAGCGGCGGCAGCAGCGG</i><br/><i>CGGCAGCAGCGGCAGCGAA</i><br/><i>ACCCCGGGCACCAGCGAAA</i><br/><i>GCGCGACCCCGGAAAGCAG</i><br/><i>CGGCGGCAGCAGCGGCGG</i><br/><i>TAGCAGC</i>ACCCTGAACATCG<br/>AGGACGAGTATCGTCTGCAT<br/>GAGACCAGCAAGGAGCCGG<br/>ATGTTAGCCTGGGTAGCACC<br/>TGGCTGAGCGACTTTCCGC<br/>AGGCGTGGGCGGAAACCGG<br/>CGGCATGGGTCTGGCGGTT<br/>CGCCAGGCGCCGCTGATCA<br/>TTCCGCTGAAGGCGACCAG<br/>CACCCCGGTTAGCATCAAG<br/>CAGTATCCGATGAGCCAGG<br/>AAGCGCGTCTGGGTATTAAG<br/>CCGCACATTCAACGTCTGCT<br/>GGACCAGGGTATTCTGGTG<br/>CCGTGCCAGAGCCCGTGGA<br/>ATACCCCGCTGCTGCCGGT<br/>GAAGAAACCGGGTACCAAT<br/>GATTACCGTCCGGTGCAAG<br/>ACCTGCGTGAGGTTAACAAG<br/>CGCGTTGAAGATATTCATCC<br/>GACCGTCCGAACCCGTAC<br/>AACCTGCTGAGCGGTCTGC<br/>CGCCGAGCCACCAGTGGTA<br/>TACCGTGCTGGATCTGAAG<br/>GACGCGTTTTTCTGCCTGCG<br/>TCTGCACCCGACCAGCCAA<br/>CCGCTGTTCCGCTTTGAATG<br/>GCGTGACCCGGAATGGGT<br/>ATCAGCGGCCAACTGACCT<br/>GGACCCGTCTGCCGCAGGG<br/>CTTTAAAAACAGCCCGACCC<br/>TGTTCAACGAGGCGCTGCA<br/>CCGTGATCTGGCGGACTTC<br/>CGTATCCAACACCCGGATCT<br/>GATCCTGCTGCAGTACGTG<br/>GACGATCTGCTGCTGGCGG<br/>CGACCAGCGAACTGGATTG<br/>CCAACAGGGTACCCGTGCG<br/>CTGCTGCAGACCCTGGGTA<br/>ACCTGGGTTACCGTGCGAG<br/>CGCGAAAAAGGCGCAAATTT<br/>GCCAGAAGCAAGTGAAGTAT</p> | <p>A 33-amino acid linker (in red) fused with the M-MLV2 encoding sequence (in black). 20 bp overhangs for Gibson assembly into pCas9n(H840A) is shown in gray italic.</p> |

|  |                                                                                                                                                                                                                                                                                                                                                                                                                                                                                                                                                                                                                                                                                                                                                                                                                                                                                                                                                                                                                                                                                                                                                                                                                              |  |
|--|------------------------------------------------------------------------------------------------------------------------------------------------------------------------------------------------------------------------------------------------------------------------------------------------------------------------------------------------------------------------------------------------------------------------------------------------------------------------------------------------------------------------------------------------------------------------------------------------------------------------------------------------------------------------------------------------------------------------------------------------------------------------------------------------------------------------------------------------------------------------------------------------------------------------------------------------------------------------------------------------------------------------------------------------------------------------------------------------------------------------------------------------------------------------------------------------------------------------------|--|
|  | CTGGGCTACCTGCTGAAGG<br>AAGGTCAACGCTGGCTGAC<br>CGAGGCGCGTAAGGAAACC<br>GTTATGGGTCAGCCGACCC<br>CGAAGACCCCGCGCCAAC<br>GCGTGAGTTCCTGGGTAAA<br>GCGGGTTTTTGCCGTCTGTT<br>TATCCCGGGTTTCGCGGAAA<br>TGCGGCGCCGCTGTACCC<br>GCTGACCAAACCGGGTACC<br>CTGTTTAACTGGGGTCCGGA<br>CCAGCAGAAAGCGTACCAA<br>GAGATCAAACAGGCGCTGC<br>TGACCGCGCCGGCGCTGGG<br>TCTGCCGGACCTGACCAAG<br>CCGTTGAGCTGTTTGTGTA<br>TGAAAAGCAGGGTTATGCGA<br>AAGGCGTTCTGACCCAGAAA<br>CTGGGTCCGTGGCGCCGTC<br>CGGTTGCGTACCTGAGCAA<br>GAAACTGGATCCGGTTGCG<br>GCGGGCTGGCCGCCGTGCC<br>TGCGTATGGTTGCGGCGAT<br>CGCGGTTCTGACCAAAGAC<br>GCGGGCAAGCTGACCATGG<br>GTCAACCGCTGGTGATTCTG<br>GCGCCGCATGCGGTTGAAG<br>CGCTGGTTAAGCAGCCGCC<br>GGACCGTTGGCTGAGCAAC<br>GCGCGTATGACCCACTATCA<br>AGCGCTGCTGCTGGATACC<br>GACCGTGTTCAAGTTCGGTCC<br>GGTGGTTGCGCTGAACCCG<br>GCGACCCTGCTGCCGCTGC<br>CGGAGGAAGGTCTGCAGCA<br>TAACTGCCTGGACATTCTGG<br>CGGAGGCGCACGGTACCCG<br>TCCGGATCTGACCGACCAG<br>CCGCTGCCGGACGCGGATC<br>ACACCTGGTATAACCGACGG<br>CAGCAGCCTGCTGCAAGAA<br>GGCCAGCGTAAGGCGGGTG<br>CGGCGGTTACCACCGAGAC<br>CGAAGTTATCTGGGCGAAA<br>GCGCTGCCGGCGGGTACCA<br>GCGCGCAGCGTGCGGAGCT<br>GATTGCGCTGACCCAAGCG<br>CTGAAAATGGCGGAGGGCA<br>AAAAGCTGAATGTTTATACC<br>GATAGCCGTTACGCGTTTGC<br>GACCGCGCACATCCATGGT |  |
|--|------------------------------------------------------------------------------------------------------------------------------------------------------------------------------------------------------------------------------------------------------------------------------------------------------------------------------------------------------------------------------------------------------------------------------------------------------------------------------------------------------------------------------------------------------------------------------------------------------------------------------------------------------------------------------------------------------------------------------------------------------------------------------------------------------------------------------------------------------------------------------------------------------------------------------------------------------------------------------------------------------------------------------------------------------------------------------------------------------------------------------------------------------------------------------------------------------------------------------|--|

|                                                         |                                                                                                                                                                                                                                                                                                                                                                             |                                                                                                                                                                                                                                                   |
|---------------------------------------------------------|-----------------------------------------------------------------------------------------------------------------------------------------------------------------------------------------------------------------------------------------------------------------------------------------------------------------------------------------------------------------------------|---------------------------------------------------------------------------------------------------------------------------------------------------------------------------------------------------------------------------------------------------|
|                                                         | <p>GAAATCTACCGTCGTCGTGG<br/> TTGGCTGACCAGCGAAGGC<br/> AAAGAAATCAAAAATAAGGA<br/> CGAGATTCTGGCGCTGCTG<br/> AAAGCGCTGTTCCCTGCCGAA<br/> ACGTCTGAGCATCATTCACT<br/> GCCCCGGTCACCAGAAAGG<br/> TCACAGCGCGGAGGCGCGT<br/> GGTAATCGCATGGCGGATC<br/> AAGCGGCGCGTAAAGCGGC<br/> GATTACCGAAACCCCGGATA<br/> CCAGCACCCCTGCTGATTGAA<br/> AATAGCAGCCCGTAA<i>TAACT</i><br/> CGAGTAAGGATCTCC</p> |                                                                                                                                                                                                                                                   |
| <p>An example (TAAin) of functional PEGRNA cassette</p> | <p><i>ttgacagctagctcagctcaggtataata</i><br/> <i>ctagt</i><b>CTTGTCACTACTCTGAC</b><br/> <b>CTA</b>GTTTTAGAGCTAGAAAT<br/> AGCAAGTTAAAATAAGGCTA<br/> GTCCGTTATCAACTTGAAAA<br/> AGTGGCACCGAGTCGGTGC<br/> <b>TTGAACACCTTAATAGGTCA</b><br/> <b>GAGTAGTA</b>tttttt</p>                                                                                                             | <p>Green: J23119 promoter<br/> Red: 20-nt spacer targeting GFPplus coding sequence<br/> Black: 76-nt gRNA scaffold<br/> Blue: RTT of the 3 prime extension, the target TAA is shown in bold, italic<br/> Orange: PBS of the 3 prime extension</p> |

**Supplementary Table 4. Spacers and 3 prime extensions used in this study**

| PEgRNA                 | Space (5'-3')                | 3 prime extension (5'-3')            | RTT length (nt) | PBS length (nt) |
|------------------------|------------------------------|--------------------------------------|-----------------|-----------------|
| PEgRNA_GFP_TAAin_T4    | CTTGTCAC<br>TACTCTGA<br>CCTA | TTAATAGGTCAGAGTAGTGA                 | 7               | 13              |
| PEgRNA_GFP_TAAin_T5    | CTTGTCAC<br>TACTCTGA<br>CCTA | CTTAATAGGTCAGAGTAGTGA                | 8               | 13              |
| PEgRNA_GFP_TAAin_T8    | CTTGTCAC<br>TACTCTGA<br>CCTA | CACCTTAATAGGTCAGAGTAGTGA             | 11              | 13              |
| PEgRNA_GFP_TAAin       | CTTGTCAC<br>TACTCTGA<br>CCTA | TTGAACACCTTAATAGGTCAGAGTAGTGA        | 16              | 13              |
| PEgRNA_GFP_TAAin_T20   | CTTGTCAC<br>TACTCTGA<br>CCTA | AAAAGCATTGAACACCTTAATAGGTCAGAGTAGTGA | 23              | 13              |
| PEgRNA_GFP_TAAin_PBS5  | CTTGTCAC<br>TACTCTGA<br>CCTA | TTGAACACCTTAATAGGTCAG                | 16              | 5               |
| PEgRNA_GFP_TAAin_PBS8  | CTTGTCAC<br>TACTCTGA<br>CCTA | TTGAACACCTTAATAGGTCAGAGT             | 16              | 8               |
| PEgRNA_GFP_TAAin_PBS17 | CTTGTCAC<br>TACTCTGA<br>CCTA | TTGAACACCTTAATAGGTCAGAGTAGTGACAAG    | 16              | 17              |
| PEgRNA_GFP_T198A       | CTTGTCAC<br>TACTCTGA<br>CCTA | TTGAACACCTTAGGTCAGAGTAGTGA           | 13              | 13              |
| PEgRNA_GFP_T196C_T198C | CTTGTCAC<br>TACTCTGA<br>CCTA | TTGAACACCGTGGGTCAGAGTAGTGA           | 13              | 13              |
| PEgRNA_GFP_198Tdel     | CTTGTCAC<br>TACTCTGA<br>CCTA | ATTGAACACCTTAGGTCAGAGTAGTGA          | 13              | 13              |
| PEgRNA_GFP_ombo        | CTTGTCAC<br>TACTCTGA<br>CCTA | TTGAACACTTATTAGGTCAGAGTAGTGA         | 15              | 13              |

|                       |                              |                                                                 |    |    |
|-----------------------|------------------------------|-----------------------------------------------------------------|----|----|
| PEgRNA_GFP_12in       | CTTGTCAC<br>TACTCTGA<br>CCTA | TTGAACACCTGTACAGATTACATAGGTCAGAGTAG<br>TGA                      | 25 | 13 |
| PEgRNA_GFP_18in       | CTTGTCAC<br>TACTCTGA<br>CCTA | TTGAACACCCTATAGTGAGTCGTATTAATAGGTCA<br>GAGTAGTGA                | 31 | 13 |
| PEgRNA_GFP_33in       | CTTGTCAC<br>TACTCTGA<br>CCTA | TTGAACACCCTCGCCCGCTCGGTTTCGTGGGCTG<br>ATTCTACAATAGGTCAGAGTAGTGA | 46 | 13 |
| PEgRNA_GFP_10del      | CTTGTCAC<br>TACTCTGA<br>CCTA | GGGAAAAGCATTGGTCAGAGTAGTGA                                      | 13 | 13 |
| PEgRNA_GFP_23del      | CTTGTCAC<br>TACTCTGA<br>CCTA | TGATCCGGATAACGTCAGAGTAGTGA                                      | 13 | 13 |
| PEgRNA_GFP_36del      | CTTGTCAC<br>TACTCTGA<br>CCTA | ATGCCGTTTCATGGTCAGAGTAGTGA                                      | 13 | 13 |
| PEgRNA_GFP_49del      | CTTGTCAC<br>TACTCTGA<br>CCTA | TCTTGAAAAAGTCGTCAGAGTAGTGA                                      | 13 | 13 |
| PEgRNA_GFP_97del      | CTTGTCAC<br>TACTCTGA<br>CCTA | CTTTGAAAGATATGTCAGAGTAGTGA                                      | 13 | 13 |
| PEgRNA_lacZ_TAGin     | AATCCCGA<br>ATCTCTATC<br>GTG | TCAACCACCTACGCACGATAGAGATTCGG                                   | 16 | 13 |
| PEgRNA_lacZ_CGdel     | TATGCAGC<br>AACGAGAC<br>GTCA | ATGAGCGGCATTTTCTGACGTCCTCGTTGCTGC                               | 18 | 14 |
| PEgRNA_lacZ_GTtoTASub | GCGAGTTG<br>CGTGACTA<br>CCTA | ACTGTTACCCGTTAGTAGTCACGCAACT                                    | 14 | 14 |
| PEgRNA_galK_TAAin     | GACAGCCA<br>CACCTTTG<br>GGCA | GCAGTTTCCTAAATGCCCAAAGGTGTGGC                                   | 16 | 13 |
| PEgRNA_GFP_312Gdel    | CTATATCTT<br>TCAAAGAT<br>GAC | TTGTAGTTCGGTCATCTTTGAAAGAT                                      | 13 | 13 |

| nsgRNA                    | PE3 or PE3b <sup>1,10</sup> | Space (5'-3')        |  |  |
|---------------------------|-----------------------------|----------------------|--|--|
| nsgRNA_GFP_T<br>AAin      | PE3b                        | AAAGCATTGAACACCTtaAT |  |  |
| nsgRNA_lacZ_T<br>AGin     | PE3b                        | CctaCGCACGATAGAGATTC |  |  |
| nsgRNA_lacZ_C<br>Gdel     | PE3                         | CTGGAGTGACGGCAGTTATC |  |  |
| nsgRNA_lacZ_G<br>TtoTAsub | PE3                         | CATTAAAGCGAGTGGCAACA |  |  |



**Supplementary Table 5. A CFU assay of *E. coli* strains transformed with different plasmids**

| <b>Plasmid</b>                                | <b>LB Plate (200 ng/ml of ATc, 100 ug/ml of Spec and Amp, and 25 ug/ml of Chl were used)</b> | <b>CFU (Mean <math>\pm</math> SD)<br/>n=3</b> | <b>Induction/non-induction</b> |
|-----------------------------------------------|----------------------------------------------------------------------------------------------|-----------------------------------------------|--------------------------------|
| pCDF-GFP                                      | Spec                                                                                         | 12800000 $\pm$<br>1552417.47                  |                                |
| pCDF-GFP                                      | Spec + ATc                                                                                   | 10333333.3 $\pm$<br>960902.35                 | (82.1 $\pm$ 17.3)%             |
| pCDF-GFP +<br>pCRISPR-PE                      | Spec + Chl                                                                                   | 21810 $\pm$<br>1174.61                        |                                |
| pCDF-GFP +<br>pCRISPR-PE                      | Spec + Chl + ATc                                                                             | 17550 $\pm$<br>2255.39                        | (80.8 $\pm$ 13.4)%             |
| pCDF-CDF +<br>pCRISPR-PE +<br>pPEgRNA-GFP-del | Spec + Chl + Amp                                                                             | 1830 $\pm$ 542.49                             |                                |
| pCDF-GFP +<br>pCRISPR-PE +<br>pPEgRNA-GFP-del | Spec + Chl + Amp + ATc                                                                       | 1110 $\pm$ 274.95                             | (67.9 $\pm$ 36.6)%             |
| pCDF-GFP +<br>pCRISPR-PE +<br>pPEgRNA         | Spec + Chl + Amp                                                                             | 6510 $\pm$ 1188.32                            |                                |
| pCDF-GFP +<br>pCRISPR-PE +<br>pPEgRNA         | Spec + Chl + Amp + ATc                                                                       | 1470 $\pm$ 274.95                             | (23.4 $\pm$ 7.1)%              |

White background: not induced; grey background: induced with ATc.

**Supplementary Table 6. The max. doubling time of strains with and without inducer, data are mean of the 12 repeats of each sample**

|                               | Induced  |                                     |                                            | Uninduced |                                     |                                            |
|-------------------------------|----------|-------------------------------------|--------------------------------------------|-----------|-------------------------------------|--------------------------------------------|
|                               | pCDF-GFP | pCDF-GFP+<br>pCRISPR-PE+<br>pPEgRNA | pCDF-GFP+<br>pCRISPR-PE+<br>pPEgRNA-GFPdel | pCDF-GFP  | pCDF-GFP+<br>pCRISPR-PE+<br>pPEgRNA | pCDF-GFP+<br>pCRISPR-PE+<br>pPEgRNA-GFPdel |
| <b>Slope [h<sup>-1</sup>]</b> | 0.6948   | 0.5285                              | 0.5288                                     | 0.6712    | 0.6139                              | 0.5867                                     |
| <b>R squared</b>              | 0.9801   | 0.9816                              | 0.9836                                     | 0.9792    | 0.9813                              | 0.9875                                     |
| <b>max. doubling time [h]</b> | 0.9976   | 1.3115                              | 1.3108                                     | 1.0327    | 1.1291                              | 1.1814                                     |

**Supplementary Table 7. Whole-genome sequencing-based analysis of escapers from the CRISPR-Prime Editing**

| Strain | Recorded mutations <sup>a</sup> |                                                         |                     |               | SRA Accession |
|--------|---------------------------------|---------------------------------------------------------|---------------------|---------------|---------------|
|        | On-plasmids                     |                                                         |                     | On-chromosome |               |
|        | pCDF-GFPplus                    | pPEgRNA_GFP_19 8Tdel                                    | pCRISPR-PE-bacteria |               |               |
| PE0035 | 0                               | 0                                                       | 0                   | 0             | SRR15371476   |
| PE0036 | 0                               | 2 (Pos. 126. -26 bp, the 3 prime extension was missing) | 0                   | 0             | SRR15371475   |
| PE0037 | 0                               | 2 (Pos. 126. -26 bp, the 3 prime extension was missing) | 0                   | 0             | SRR15371474   |
| PE0038 | 0                               | 0                                                       | 0                   | 0             | SRR15371492   |
| PE0039 | 0                               | 0                                                       | 0                   | 0             | SRR15371491   |
| PE0040 | 0                               | 0                                                       | 0                   | 0             | SRR15371490   |
| PE0041 | 0                               | 0                                                       | 0                   | 0             | SRR15371489   |
| PE0042 | 0                               | 0                                                       | 0                   | 0             | SRR15371488   |
| PE0043 | 0                               | 1 (Pos. 126. -26 bp, the 3 prime extension was missing) | 0                   | 0             | SRR15371487   |
| PE0044 | 0                               | 0                                                       | 0                   | 0             | SRR15371486   |
| PE0045 | 0                               | -                                                       | -                   | 0             | SRR15371485   |
| PE0046 | -                               | -                                                       | 0                   | 0             | SRR15371484   |
| PE0047 | 0                               | -                                                       | 0                   | 0             | SRR15371483   |
| PE0048 | 0                               | 1 (Pos. 126. -26 bp, no 3 prime extension was cloned)   | 0                   | 0             | SRR15371481   |

<sup>a</sup>: the shared mutations were listed here.

One shared mutation in pCRISPR-PE-bacteria is Pos. 8,584. A43A (GCC→GCA);

One shared mutation in pPEgRNA\_GFP\_198Tdel is Pos. 1,146. G→A, intergenic, 6XHis;

One shared mutation in the chromosome is Pos. 4,272,972. +T, intergenic.

**Supplementary Table 8. Overview of generated illumina datasets**

| Parental strain    | NCBI sample name | SRA Accession | Names in Table S7 and S1              |
|--------------------|------------------|---------------|---------------------------------------|
| K-12 substr. DH10B | YT_gp1           | SRR15371494   | PE0005                                |
| K-12 substr. DH10B | YT_gp2           | SRR15371493   | PE0016                                |
| K-12 substr. DH10B | YT_gp3           | SRR15371482   | PE0013                                |
| K-12 substr. DH10B | YT_gp4           | SRR15371480   | PE0014                                |
| K-12 substr. DH10B | YT_gp5           | SRR15371479   | PE0015                                |
| K-12 substr. DH10B | YT_gp6           | SRR15371478   | PE0017                                |
| K12 substr. MG1655 | YT_g7            | SRR15371774   | PE0026                                |
| K12 substr. MG1655 | YT_g8            | SRR15371773   | PE0027                                |
| K12 substr. MG1655 | YT_g9            | SRR15371772   | PE0028                                |
| K12 substr. MG1655 | YT_g10           | SRR15371771   | PE0029                                |
| K-12 substr. DH10B | YT_g11           | SRR15371477   | Escherichia coli DH10 $\beta$ (DH10B) |
| K12 substr. MG1655 | YT_g12           | SRR15371770   | Escherichia coli MG1655               |
| K-12 substr. DH10B | cwi15            | SRR15371476   | PE0035                                |
| K-12 substr. DH10B | cwi16            | SRR15371475   | PE0036                                |
| K-12 substr. DH10B | cwi17            | SRR15371474   | PE0037                                |
| K-12 substr. DH10B | cwi18            | SRR15371492   | PE0038                                |
| K-12 substr. DH10B | cwi19            | SRR15371491   | PE0039                                |
| K-12 substr. DH10B | cwi20            | SRR15371490   | PE0040                                |
| K-12 substr. DH10B | cwi21            | SRR15371489   | PE0041                                |
| K-12 substr. DH10B | cwi22            | SRR15371488   | PE0042                                |
| K-12 substr. DH10B | cwi23            | SRR15371487   | PE0043                                |
| K-12 substr. DH10B | cwi24            | SRR15371486   | PE0044                                |
| K-12 substr. DH10B | cwi25            | SRR15371485   | PE0045                                |
| K-12 substr. DH10B | cwi26            | SRR15371484   | PE0046                                |
| K-12 substr. DH10B | cwi27            | SRR15371483   | PE0047                                |
| K-12 substr. DH10B | cwi28            | SRR15371481   | PE0048                                |

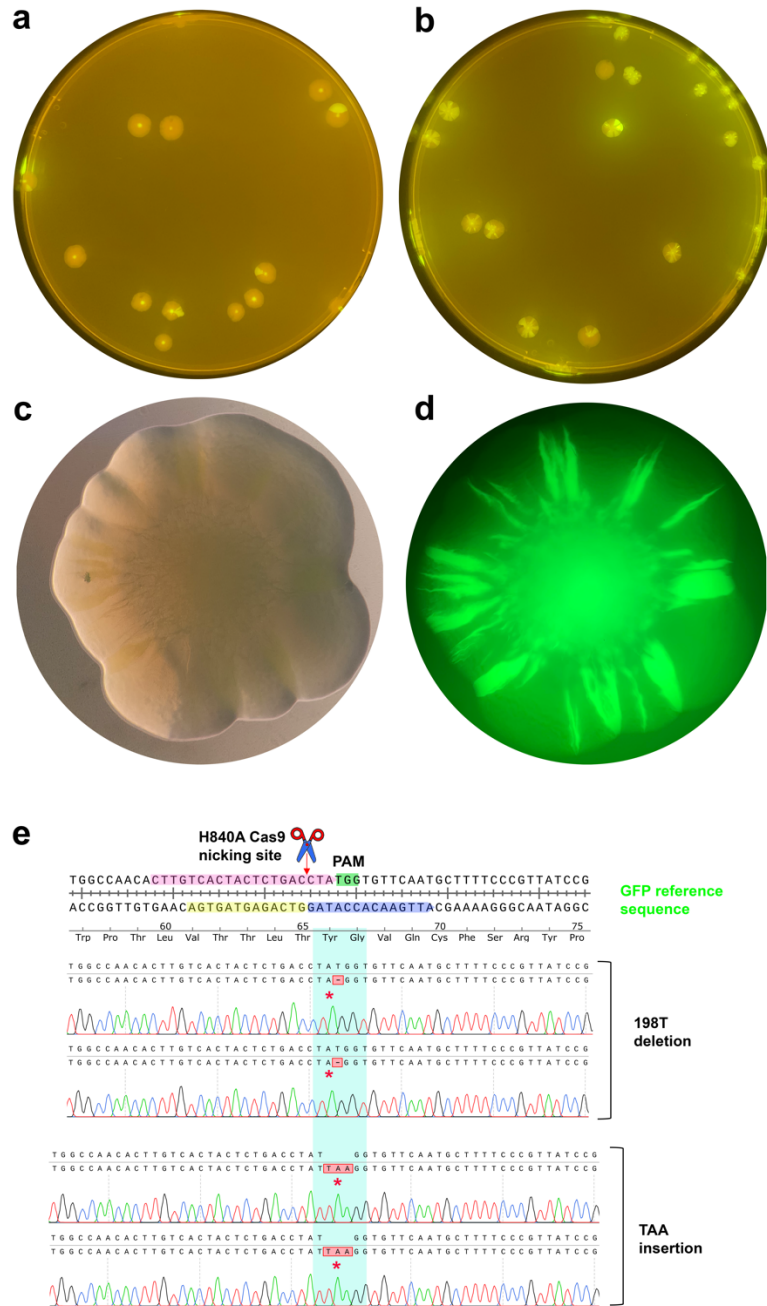

**Supplementary Figure 1. Editing accumulates over time of using CRISPR-Prime Editing system in *E. coli*.**

- a. A five-day old induction (200 ng/mL ATc) plate of GFP 1-bp deletion under a Blue-Light Transilluminator (Safe Imager 2.0, Thermo Fisher Scientific, US).
- b. A five-day old induction (200 ng/mL ATc) plate of GFP 3-bp insertion under a Blue-Light Transilluminator (Safe Imager 2.0, Thermo Fisher Scientific, US).

- c.** The 40x optical view of a single colony from **b.** under a Leica DM4000 B Fluorescence Microscope (Leica Microsystems, Germany)
- d.** The 40x GFP fluorescent view of the same colony as **c.** using the same microscope.
- e.** Two of each outgrown colony from **a.** and **b.** were Sanger-sequenced. The in-figure legend is the same as Fig. 2a.

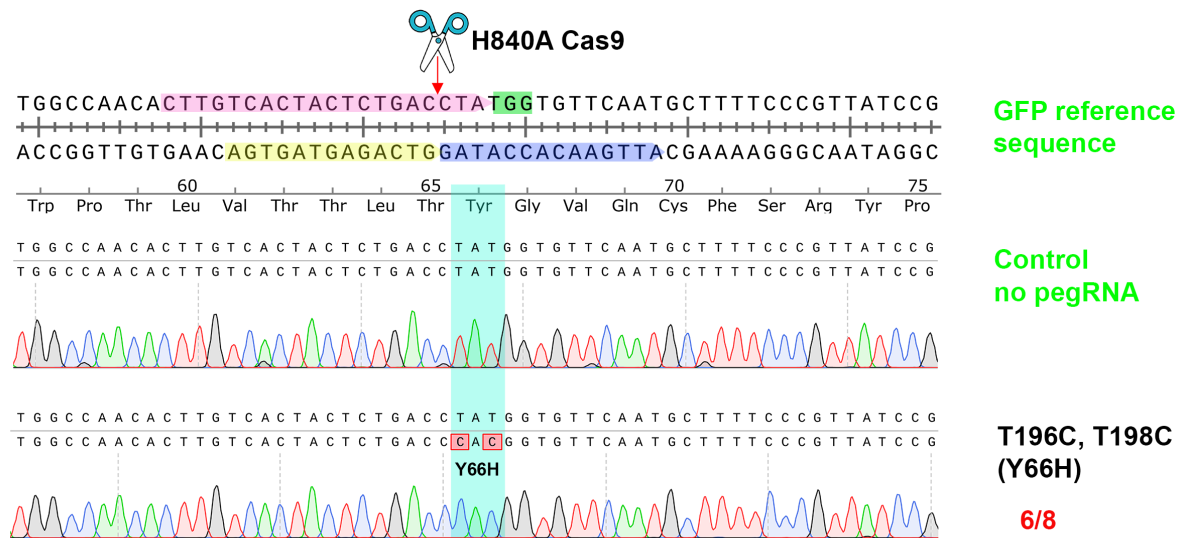

**Supplementary Figure 2. A DNA editing of double substitutions by CRISPR-Prime Editing.**

Eight randomly picked colonies of each designed DNA engineering were Sanger sequenced and traces were aligned to the targeted locus of GFP coding sequence. The correctly edited colony numbers and the total sequenced numbers were shown in red. The in-figure legend is the same as Fig. 2a.

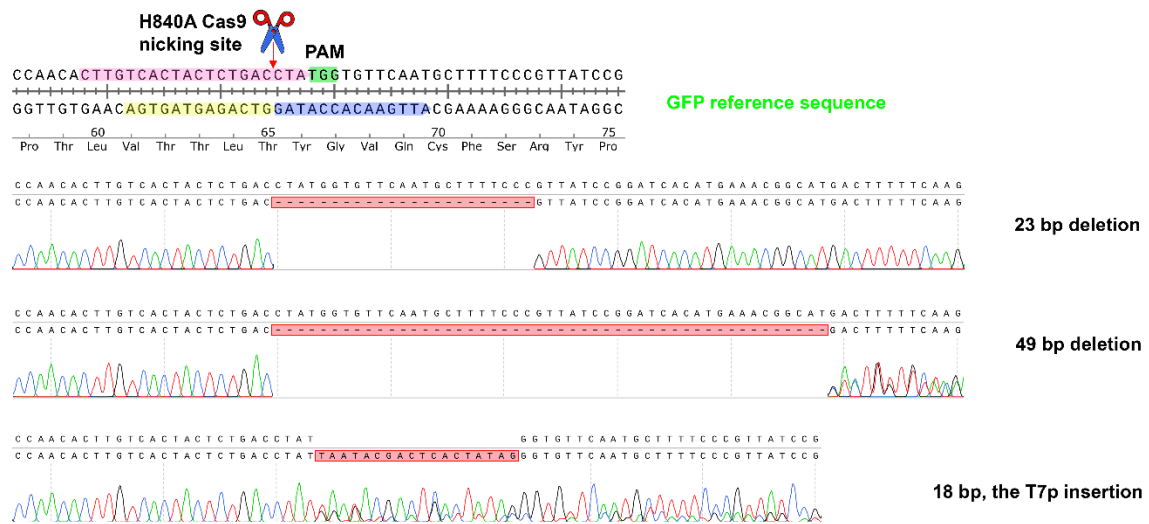

**Supplementary Figure 3. Long DNA fragments deletion and insertions using CRISPR-Prime Editing in *E. coli*.**

As examples, Sanger sequencing traces of a 23-bp deletion, a 49-bp deletion, and a 18-bp (mini-T7 promoter) insertion traces were aligned to the targeted locus of GFP coding sequence. The in-figure legend is the same as Fig. 2a.



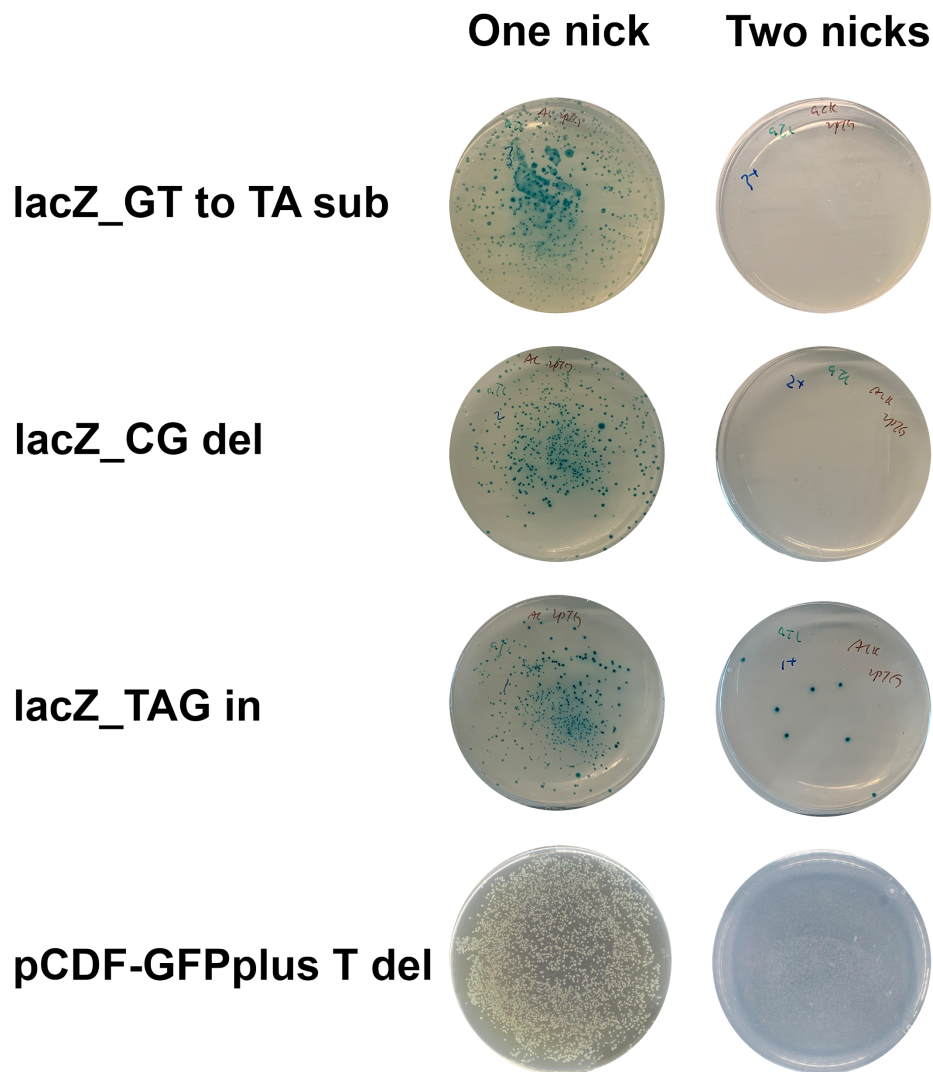

**Supplementary Figure 4. A second nick compromises the application of CRISPR-Prime Editing in *E. coli*.**

Plates showed the colony formation of transformants. For the one nick panel, 50  $\mu$ l of transformation culture was plated onto appropriate antibiotics supplemented LB plates, while for the two nicks panel, 400  $\mu$ l of transformation culture was plated. Photos were taken by a Doc-It imaging station after 24h incubation at 37  $^{\circ}$ C.

**a**

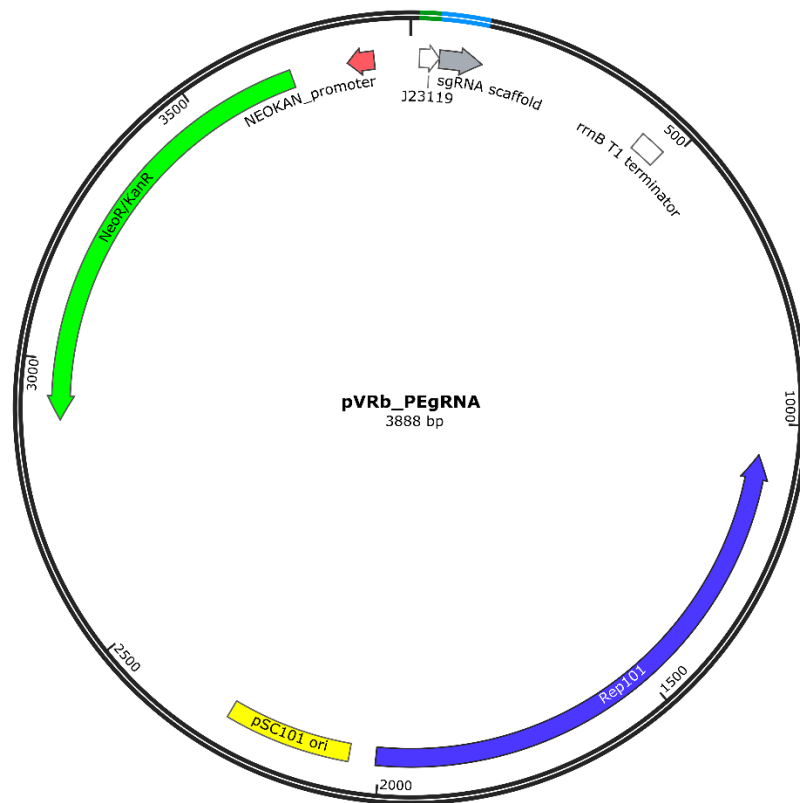

**b**

```
ttgacagctagctcagtcctaggtataaactagtgTTT TAGAGCTAGAAATAGCAAGTTAAAATAAGGCTAGTCCGTTATCAACTTGAAAAAGTGGCACCGAGTCGGTGC
aactgtcgatcagtcaggatccatattatgatcaCAAAATCTCGATCTTATCGTTCAATTTATTCAGATCAGGCAATAGTTGAACTTTTCCACCCTGGCTCAGCCACG
```

J23119 → sgRNA scaffold →

**Supplementary Figure 5. The plasmid map of pVRb\_PEGRNA.**

- a. The plasmid map of the pVRb\_PEGRNA plasmid, which is pSC101 ori, kanamycin resistant, and with a J23119 driven sgRNA scaffold.
- b. The DNA sequence of the J23119-sgRNA scaffold is displayed. The J23119 promoter sequence is in green, and the sgRNA scaffold is in blue.

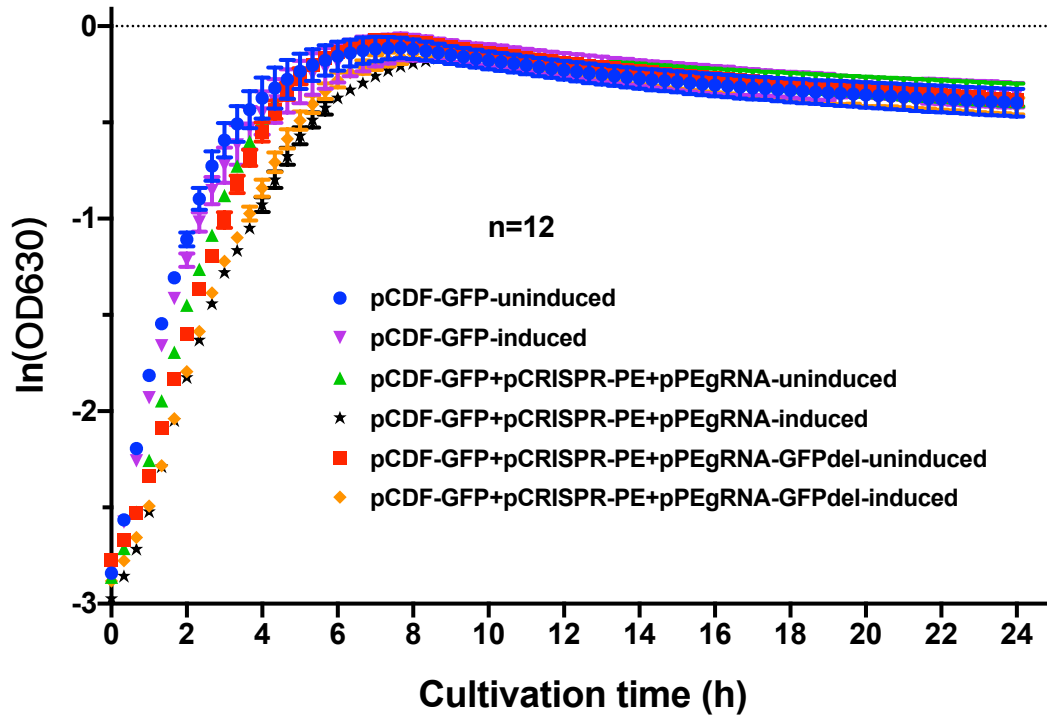

**Supplementary Figure 6. Growth profiles of *E. coli* strains transformed with different plasmids under induced and uninduced conditions.**

Growth profiling was performed in a ELx808 plate reader (Buch & Holm A/S). The 96-well microtiter plate with F-bottoms and a lid was incubated in the plate reader at 37 °C with constant shaking, and the OD630 was measured every 20 minutes for 24 hours. 200  $\mu$ l of microtiter cultures with a starting OD630 of 0.05 was used. The concentration of inducer ATc is 200 ng/ml. All measurements were normalized based on the media blanks, and the mean and standard deviation of all 12 biological replicates were calculated.

## Supplementary reference:

- 1 Anzalone, A. V. *et al.* Search-and-replace genome editing without double-strand breaks or donor DNA. *Nature* **576**, 149-157, doi:10.1038/s41586-019-1711-4 (2019).
- 2 Lin, Q. *et al.* Prime genome editing in rice and wheat. *Nat. Biotechnol.* **38**, 582-585, doi:10.1038/s41587-020-0455-x (2020).
- 3 Mali, P. *et al.* CAS9 transcriptional activators for target specificity screening and paired nickases for cooperative genome engineering. *Nat. Biotechnol.* **31**, 833-838, doi:10.1038/nbt.2675 (2013).
- 4 Ran, F. A. *et al.* Double nicking by RNA-guided CRISPR Cas9 for enhanced genome editing specificity. *Cell* **154**, 1380-1389, doi:10.1016/j.cell.2013.08.021 (2013).
- 5 Bowater, R. & Doherty, A. J. Making ends meet: repairing breaks in bacterial DNA by non-homologous end-joining. *PLoS Genet.* **2**, e8, doi:10.1371/journal.pgen.0020008 (2006).
- 6 Shuman, S. & Glickman, M. S. Bacterial DNA repair by non-homologous end joining. *Nat. Rev. Microbiol.* **5**, 852-861, doi:10.1038/nrmicro1768 (2007).
- 7 Tong, Y., Charusanti, P., Zhang, L., Weber, T. & Lee, S. Y. CRISPR-Cas9 Based Engineering of Actinomycetal Genomes. *ACS Synth. Biol.* **4**, 1020-1029, doi:10.1021/acssynbio.5b00038 (2015).
- 8 Qi, L. S. *et al.* Repurposing CRISPR as an RNA-guided platform for sequence-specific control of gene expression. *Cell* **152**, 1173-1183, doi:10.1016/j.cell.2013.02.022 (2013).
- 9 Rhodius, V. A. *et al.* Design of orthogonal genetic switches based on a crosstalk map of  $\sigma$ s, anti- $\sigma$ s, and promoters. *Mol. Syst. Biol.* **9**, 702, doi:10.1038/msb.2013.58 (2013).
- 10 Hsu, J. Y. *et al.* PrimeDesign software for rapid and simplified design of prime editing guide RNAs. doi:10.1101/2020.05.04.077750.
